# Supplementary material for: Conjugated Linoleic Acid Ameliorates High Fat-Induced Insulin Resistance via Regulating Gut Microbiota–Host Metabolic and Immunomodulatory Interactions
Source: MDPI journal article supplement (doi:10.3390/nu16081133), 2024-04-11
Supplement: s1 [file s1]

*Supplementary Materials*

# Conjugated Linoleic Acid Ameliorates High Fat-Induced Insulin Resistance via Regulating Gut Microbiota–Host Metabolic and Immunomodulatory Interactions

Linjun Wu <sup>1,†</sup>, Shijie Ye <sup>1,†</sup>, Xiangfei Deng <sup>1</sup>, Zhengwei Fu <sup>1,\*</sup>, Jinjun Li <sup>2,3,4,5,\*</sup> and Chunlei Yang <sup>1,\*</sup>

<sup>1</sup> College of Biotechnology and Bioengineering, Zhejiang University of Technology, Hangzhou 310014, China; 2112005190@zjut.edu.cn (L.W.); yeshijie0423@163.com (S.Y.); 2112005101@zjut.edu.cn (X.D.)

<sup>2</sup> Food Science Institute, Zhejiang Academy of Agricultural Sciences, Hangzhou 310021, China

<sup>3</sup> Key Laboratory of Postharvest Preservation and Processing of Vegetables (Co-Construction by Ministry and Province), Ministry of Agriculture and Rural Affairs, Hangzhou 310021, China

<sup>4</sup> Key Laboratory of Post-Harvest Handling of Fruits, Ministry of Agriculture and Rural Affairs, Hangzhou 310021, China

<sup>5</sup> Key Laboratory of Fruits and Vegetables Postharvest and Processing Technology Research of Zhejiang Province, Hangzhou 310021, China

\* Correspondence: azwfu@zjut.edu.cn (Z.F.); lijijun@zaas.ac.cn (J.L.); chunleiyang@zjut.edu.cn (C.Y.)

† These authors contributed equally to this work.

**Table S1** Primers used in this study.

| Name                            | Primer (5'-3')                                                       |
|---------------------------------|----------------------------------------------------------------------|
| <i>TNF-<math>\alpha</math></i>  | Forward: GCTTGTCACCTCGAATTTTGAGA<br>Reverse: CCTCTGGCGAATGGCTTTAC    |
| <i>IL-1<math>\beta</math></i>   | Forward: GCAACTGTTCTGAACTCAACT<br>Reverse: ATCTTTTGGGGTCCGTCAACT     |
| <i>IL-6</i>                     | Forward: TAGTCCTTCCTACCCCAATTTC<br>Reverse: TTGGTCCTTAGCCACTCCTTC    |
| <i>IL-10</i>                    | Forward: GCTCTTACTGACTGGCATGAG<br>Reverse: CGCAGCTCTAGGAGCATGTG      |
| <i>CD36</i>                     | Forward: ATGGGCTGTGATCGGAACTG<br>Reverse: GTCTTCCAATAAGCATGTCTCC     |
| <i>FABP1</i>                    | Forward: TGGTCCGCAATGAGTTCACCCT<br>Reverse: CCAGCTTGACGACTGCCTTGACTT |
| <i>SLC27A1</i>                  | Forward: CGCTTTCTGCGTATCGTCTG<br>Reverse: GATGCACGGGATCGTGTCT        |
| <i>SREBP1</i>                   | Forward: CACTTCTGGAGACATCGCAAAC<br>Reverse: ATGGTAGACAACAGCCGCATC    |
| <i>ACC</i>                      | Forward: AGGATTTGCTGTTTCTCAGAGCTT<br>Reverse: CAGGATCTACCCAGGCCACAT  |
| <i>PPAR<math>\alpha</math></i>  | Forward: AGACAAAGAGGCAGAGGTCC<br>Reverse: AAGGAGGACAGCATCGTGAA       |
| <i>CPT1</i>                     | Forward: AGGACCCTGAGGCATCTATT<br>Reverse: ATGACCTCCTGGCATTCTCC       |
| <i>PGC1<math>\alpha</math></i>  | Forward: CCGTCTCTACTTAAGAAGCTC<br>Reverse: GTTCTGAGTGCTAAGACCG       |
| <i><math>\beta</math>-actin</i> | Forward: GGCTGTATTCCCCTCCATCG<br>Reverse: CCAGTTGGTAACAATGCCATGT     |

**Table S2** Pairwise comparisons on Bray-Curtis of each microbial community.

| <i>p</i> -value <sup>1</sup> | NC      | NC+CLA <sup>3</sup> | HF+CLA  |
|------------------------------|---------|---------------------|---------|
| NC <sup>2</sup>              | -       | 0.065               | 0.009** |
| HF <sup>4</sup>              | 0.009** | 0.009**             | 0.049*  |
| HF+CLA <sup>5</sup>          | 0.009** | 0.005**             | -       |

<sup>1</sup> $p < 0.05$ , \*\* $p < 0.01$  according to Bray-Curtis using ANOSIM.

<sup>2</sup>NC, mice fed control diet for 15 weeks ( $n = 6$ ).

<sup>3</sup>NC+CLA, mice fed control diet with 400 mg/kg body weight CLA supplemented every day for 15 weeks ( $n = 6$ ).

<sup>4</sup>HF, mice fed HF diet for 15 weeks ( $n = 6$ ).

<sup>5</sup>HF+CLA, mice fed HF diet with 400 mg/kg body weight CLA supplemented every day for 15 weeks ( $n = 6$ ).

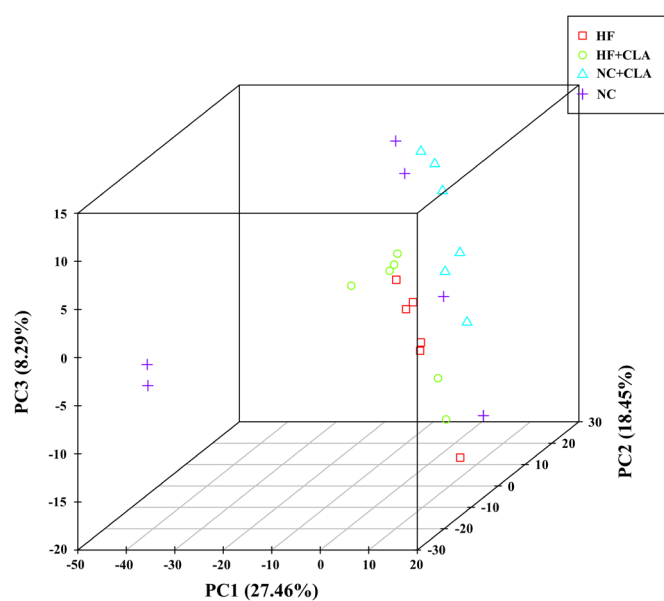

**Figure S1.** Gene expression profiles among different groups. Principal component analysis (PCA) profile of the gene expression in the liver of mice among NC, NC+CLA, HF and HF+CLA groups. NC, mice fed control diet for 15 weeks ( $n = 6$ ); NC+CLA, mice fed control diet with 400 mg/kg body weight CLA supplemented every day for 15 weeks ( $n = 6$ ); HF, mice fed HF diet for 15 weeks ( $n = 6$ ); HF+CLA, mice fed HF diet with 400 mg/kg body weight CLA supplemented every day for 15 weeks ( $n = 6$ ).
